# Supplementary material
Source: Elsevier journal article supplement (https://www.sciencedirect.com/science/article/pii/S1138359320300113)
Supplement: mmc1 [file S1138359320300113:mmc1.pdf]

Anexo I. Grupo de Atención al Inmigrante de SEMERGEN.

En representación del Grupo de Atención al Inmigrante SEMERGEN

Amor Melguizo Bejar, José Luis Cañada Merino, Juan Ramón García Cepeda, Teodoro Macías Delgado, Fernando Leiva-Cepas, José Luis Martincano Gómez, Francisco Javier Alonso Moreno, Ana Isabel Rabadán Velasco, Eugenia García Virosta, M. José Suero Jiménez, Juliana Cabrera Gómez, Ángela Rodríguez de Cossío, Halima Ahmed de Prado, M. José Lougedo Calderón, Marta Guerrero Muñoz, Laura Latorre García, María Mestre de Juan, Isabel Palomino Cobos, Ángela Sampedro Elvira, M. Belén Zachow Fernández

## Anexo 2. Encuesta

### Datos del profesional

a. Edad:

b. Sexo. 1 hombre 2 mujer

c. Cursos sobre atención a pacientes inmigrantes (se incluyen cursos de competencias culturales) realizados en los últimos 5 años. Por favor rellene la siguiente línea:

Cursos online: Cursos presenciales:

d. Médico Residente 1 Si 2 No

e. Médico en ejercicio 1 Si 2 No

f. Años de residencia (**sólo para médicos residentes**):

1 R1 2R2 3 R3 4 R4

1 Medicina de Familia 2 Otra especialidad:

g. Atiende a pacientes menores de 14 años en su consulta:

1 Si 2 No 3. Consulta de pediatría exclusivamente

h. Centro de Salud o consultorio: 1 Urbano 2 Rural

i. Trabaja en servicio de urgencias o atención continuada 1 Si 2 No

j. En caso de haber respondido afirmativamente la pregunta anterior, por favor conteste la siguiente pregunta:

1 Urgencias de A. Primaria 2 Urgencias Hospital  
3 UVI móvil 4. Urgencias de A. Primaria y Hospital

k. Años de ejercicio profesional:

l. Trabajo en un centro docente: 1 Si 2 No

m. Formación vía MIR: 1 Si 2 No

n. Tutor de Residentes: 1 Si 2 No

o. Grado de competencia percibido en la consulta con personas inmigrantes: por favor señale de 1 a 10 (siendo 1 muy baja y 10 muy alta)

1 2 3 4 5 6 7 8 8 10

## Datos del paciente

(Las siguientes preguntas se refieren al último día de consulta previo a la realización de esta encuesta)

a. Promedio total de pacientes que atiende al día:

1. Menos de 30      2. De 30 a 49      3. 50 o más

b. Cuántos pacientes inmigrantes ha atendido hoy:

c. Por favor señale el porcentaje de sexo:

1. Mujeres:      2. Hombres:

d. Las personas inmigrantes que acudieron a consulta lo hicieron con cita previa:

- 1 Si      2 No

e. En alguno de estos pacientes percibió dificultad en la consulta, por favor señale la respuesta o respuestas correctas:

1. Con el idioma
2. Dificultad con el tiempo asignado a la consulta
3. Con el conocimiento de la cultura
4. Problema administrativo o de acceso al sistema de salud (falta de tarjeta sanitaria)
5. Falta de documentos sanitarios (hoja de vacunaciones, informes médicos)

f. Por favor indique si las consultas tuvieron relación con:

(Puede señalar más de una respuesta)

1. Enfermedad común 1 Si      2 No
2. Seguimiento del embarazo 1 Si      2 No
3. Planificación familiar 1 Si      2 No
4. Accidente de trabajo o enfermedad profesional 1 Si      2 No
5. Enfermedad relacionada con el proceso migratorio (enfermedad infecciosa adquirida en su país de origen) 1 Si 2 No

6. Enfermedad relacionada con las condiciones de salud en el país de acogida  
(falta de vivienda estable, nacimiento, condiciones de trabajo)

1 Si    2 No

Muchas gracias por su participación en este cuestionario
